# Supplementary material
Source: Springer Nature journal article supplement (https://www.springermedizin.de/resource/supplementary/13058_2012_3158_MOESM8_ESM.pdf/9703160)

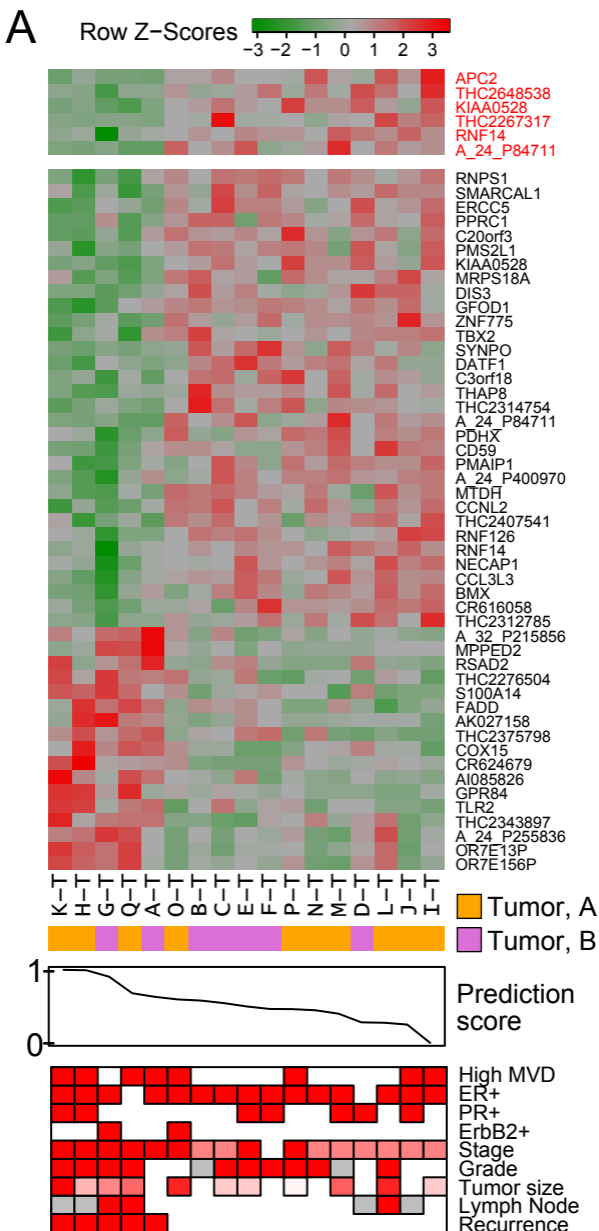

**B**

| Gene       | Elevated in | p-value |
|------------|-------------|---------|
| KDR/VEGFR2 | A           | 0.03    |
| ITGAV      | B           | 0.002   |
| PDGFRB     | B           | 0.08    |
| MET        | B           | 0.004   |

Supplement: MOESM8 [file 9703160]
